# Supplementary material for: Understanding the Often Ignored, but Ever-Present Natural Units
Source: Preprints.org preprint supplement (doi:10.20944/preprints202309.0953.v1), 2023-09-14
Supplement: Supplementary file 1 [file supplementary]

## Sheet: Data
	Planck length	1.61626e-35		reduced electron Compton wavelength	3.86159e-13		Fine-structure	0.00729735
	Planck mass	2.17643e-08		electron mass	9.10938e-31		elementary charge	1.60218e-19
	Planck time	5.39125e-44		reduced muon Compton wavelength	1.86759e-15		vacuum magnetic permeability	1.25664e-06
	Planck charge	1.87555e-18		muon mass	1.88353e-28		vacuum electric permittivity	8.85419e-12
	Planck energy	1.95608e+09		reduced tau Compton wavelength	1.11054e-16		coulomb constant	8.98755e+09
	Planck force	1.21026e+44		tau mass	3.16754e-27		Hyperfine transition frequency	9192631770
	Speed of light	299792458		Solar mass	1.98847e+30		Bohr radius	5.29177e-11
	Planck constant	6.62607e-34		Solar radius	696156000		Rydberg constant	1.09737e+07
	Reduced Planck constant	1.05457e-34					Stefan-Boltzmann constant	5.67037e-08
	Gravitational constant	6.6743e-11					Boltzmann constant	1.38065e-23
	1 Introduction
	c	299792458	1
	lP / tP	2.99792e+08	1
	ℏ	1.05457e-34	1
	lP mP c	1.05457e-34	1
	lP2 mP / tP	1.05457e-34	1
	G	6.6743e-11	1
	(lP / mP ) c2	6.6743e-11	1
	lP3 / mP tP2	6.6743e-11	1
	1.1 The natural unit scale
	ƛC / lP	2.38922e+22
	mP / m0	2.38922e+22
	2.1 Independent units of measure
	T = 1 / ΔvCs	1.08783e-10	s
	T / tP	2.01777e+33	T
	λ = c / ΔvCs	0.0326123	m
	λ / lP	2.01777e+33	L
	If we redefine the meter as precisely one-half its present-day value, the natural unit length of the hyperfine transition radiation remains unchanged
	1 m' = .5m
	c'	599584916	2
	lP'	3.23251e-35	2
	λ'	0.0652245	2
	λ' / lP'	2.01777e+33
	1/ c	3.33564e-09
	2.2 Arbitrary unit systems
	If we redefine the second as the time it takes light to travel one meter, then the Planck length and Planck time will be equal, and the universal constants would be…
	tP'	1.61626e-35	s'	tP c
	c'	1	m / s'	lP / tP'
	G'	7.42616e-28	m3 / kg s'2	[ lP / mP ] c'2
	ℏ'	3.51767e-43	kg m2 / s'	lP mP c'
	…and the natural unit length and time of the hyperfine transition radiation will still be…
	λ	0.0326123	m
	T	0.0326123	s'	λ / c'
	natural time units	2.01777e+33	T	T / tP'
	2.3 The kilogram
	Physical properties of radiation from the unperturbed ground-state hyperfine transition frequency of Cesium 133
		Wavelength	Inertial (EM) Mass	Period	Frequency	Wavenumber	Energy	Energy	Energy
		λ	m	T	f	ν	E	E	E
		m	kg	s	Hz	cycles / m	J	J	J
	SI units	0.0326123	6.77727e-41	1.08783e-10	9192631770	30.6633	6.0911e-24	6.0911e-24	6.0911e-24
	SI units	0.0326123	6.77726e-41	1.08783e-10		30.6633	6.0911e-24	6.0911e-24	6.0911e-24
		L	M	T			E
	Natural units	2.01777e+33	3.11393e-33	2.01777e+33	—	—	3.11393e-33	—	—
	Inverse natural units	4.95597e-34	3.21137e+32	4.95597e-34			3.21137e+32
		** The photon's wavelength and period are 2𝜋 times the inverse mass, so using the reduced wavelength and angular period align natural unit values of mass and energy with wavelength and period
		Reduced wavelength	Inertial (EM) Mass	Angular Period	Frequency	Wavenumber	Energy	Energy	Energy
		ƛ	m	τ	ω	k	E	E	E
		m	kg	s	radians / sec	radians / m	J	J	J
	SI units	0.0051904	6.77727e-41	1.73133e-11	5.7759e+10	192.663	6.0911e-24	6.0911e-24	6.0911e-24
	SI units	0.0051904	6.77726e-41	1.73133e-11		192.663	6.0911e-24	6.0911e-24	6.0911e-24
		0.0051904	6.77726e-41	1.73133e-11
		L	M	T			E
	Natural units	3.21138e+32	3.11393e-33	3.21138e+32			3.11393e-33
	Inverse natural units	3.11393e-33	3.21137e+32	3.11393e-33			3.21137e+32
	ƛ / lP	3.21138e+32
	mP / m	3.21137e+32
	τ / tP	3.21138e+32
	EP / E	3.21137e+32
	Table 2
	Units	ƛ	m	τ	E
	SI	meters	kilograms	seconds	joules
		0.0051904	6.77727e-41	1.73133e-11	6.0911e-24
	Natural	length (L)	mass (M)	time (T)	energy (E)
		3.21138e+32	3.11393e-33	3.21138e+32	3.11393e-33
	E	6.0911e-24
	E	6.0911e-24
	m	6.77727e-41
	1 / m	1.47552e+40
	mP / m	3.21137e+32
	× 1 / mP	4.59467e+07
	= 1 / m	1.47552e+40
	h ΔvCs / c2	6.77727e-41	1
	mP tP ΔvCs	6.77726e-41	1
	mP tP / τ	6.77726e-41	1
	3 Correlations of Matter
	3.1 Rest Mass
	Table 3
	Lepton	ƛC	m0	ƛC m0	lPmP	lP / ƛC	m0 / mP		ƛC	m0
		m	kg	kgm	kgm	L-1	M		L	M
	e	3.86159e-13	9.10938e-31	3.51767e-43	3.51767e-43	4.18546e-23	4.18546e-23		2.38922e+22	4.18546e-23
	μ	1.86759e-15	1.88353e-28	3.51767e-43	3.51767e-43	8.65421e-21	8.65421e-21		1.15551e+20	8.65421e-21
	τ	1.11054e-16	3.16754e-27	3.51767e-43	3.51767e-43	1.45538e-19	1.45538e-19		6.87106e+18	1.45538e-19
	ℏ / c	3.51767e-43	1
	ƛC m0	3.51767e-43	1
	lPmP	3.51767e-43	1
	ℏ	1.05457e-34	1
	ƛC m0 c	1.05457e-34	1
	ƛC / lP, e	2.38922e+22
	mP / m0, e	2.38922e+22
	ƛC / lP, μ	1.15551e+20
	mP / m0, μ	1.15551e+20
	ƛC / lP, τ	6.87106e+18
	mP / m0, τ	6.87105e+18
	3.2 Momentum
	Table 4
	Particle	ƛ	p	p	m	Wavelength−1	Inertial mass		m0	v
		m	kgm/s	kgm/s	kg	L−1	M		kg	m/s
	e	0.0051904	2.03177e-32	2.03177e-32	6.77727e-41	3.11393e-33	3.11393e-33		9.10938e-31	0.0223042
	μ	0.0051904	2.03177e-32	2.03177e-32	6.77727e-41	3.11393e-33	3.11393e-33		1.88353e-28	0.00010787
	τ	0.0051904	2.03177e-32	2.03177e-32	6.77727e-41	3.11393e-33	3.11393e-33		3.16754e-27	6.41436e-06
	γ	0.0051904	2.03177e-32	—	6.77727e-41	3.11393e-33	3.11393e-33		—	299792458
	Table 5
	Scenario	ƛ	m	v	τ	ω	EK		ƛC	m0	E	E
									CODATA	CODATA
		m	kg	m/s	s	Hz	eV		m	kg	kgm2/s2	kgm2/s2	kgm2/s2
	ƛ = ƛC	3.86159e-13	9.10938e-31	2.99792e+08	1.28809e-21	7.76344e+20	255499		3.86159e-13	9.10938e-31	4.09355e-14	4.09355e-14	8.18711e-14
	ƛ = 3 × ƛC	1.15848e-12	3.03646e-31	9.99308e+07	1.15928e-20	8.62605e+19	28388.8		3.86159e-13	9.10938e-31	4.54839e-15	4.54839e-15	8.18711e-14
	ƛ = ƛC / α	5.29177e-11	6.64744e-33	2.18769e+06	2.41888e-17	4.13414e+16	13.6057		3.86159e-13	9.10938e-31	2.17987e-18	2.17987e-18	8.18711e-14
	Table 6
	Scenario
	ƛ = 3 ƛC	0.333333	0.333333	0.333333	9	0.111111	0.111111	0.0555556
		1 / 3	1 / 3	1 / 3	9	1 / 9	1 / 9	1 / 18
	ƛ = 137 ƛC	0.00729735	0.00729735	0.00729735	18778.9	5.32514e-05	5.32514e-05	2.66257e-05
		1 / 137	1 / 137	1 / 137	1372	1 / 1372	1 / 1372	1 / (2*1372)
	4 Classical Gravity and Natural Units
		Massive Body	Mass	Mass	Radius	Radius
			M⊙	kg	R⊙	m
		Sagittarius A*	4154000	8.2601e+36		1.22682e+10		https://www.aanda.org/articles/aa/full_html/2019/05/aa35656-19/aa35656-19.html
		GRO J1655-40	5.31	1.05588e+31		15682.2		https://academic.oup.com/mnras/article/437/3/2554/1028565
		4U 1820−30	1.58	3.14178e+30		9100		https://iopscience.iop.org/article/10.1088/0004-637X/719/2/1807
		Sirius B	1.034	2.05608e+30	0.0084	5.84771e+06		https://iopscience.iop.org/article/10.1086/305489
		Sun	1	1.98847e+30		696156000		https://www.aanda.org/articles/aa/full_html/2018/08/aa32159-17/aa32159-17.html#:~:text=At%20607.1%20nm%2C%20the%20solar,value%20is%20%C2%B122%20km.
		Earth		5.9723e+24		6371000		https://iau-a3.gitlab.io/NSFA/NSFA_cbe.html#EarthRadius2009
	Table 8
		Massive Body	Type
				L-1	M	L-1 M
		Sagittarius A*	Supermassive black hole	1.31744e-45	3.79525e+44	1
		GRO J1655-40	Stellar mass black hole	1.03063e-39	4.85141e+38	1
		4U 1820−30	Neutron Star	1.7761e-39	1.44355e+38	0.512778
		Sirius B	White dwarf	2.76391e-42	9.447e+37	0.000522214
		Sun	Star	2.32169e-44	9.13637e+37	4.24235e-06
		Earth	Planet	2.53689e-42	2.74408e+32	1.39229e-09
	RS, Earth	0.00887025
	5 Electromagnetism
	5.1 Electrostatic force
	Ke	8.98755e+09	1
	[mP lP3] / [tP qP]	8.98755e+09	1
	√α	0.0854245	1
	e / qP	0.0854245	1
	5.2 Vacuum permittivity
	ε0	8.85419e-12	1
	[ 1 / 4πFP ] [qP / lP ]2	8.85419e-12	1
	Table 10
	Constant	Symbol	Value	Dimensions	Stdandard Form	Natural Units	Value	Alternate	Value	Current form	Value	Unit dimensions
	Planck charge	qP	1.87555e-18	C		—	—		1.87555e-18	—	—	C
	Elementary charge	e	1.60218e-19	C			1.60218e-19	—	—	—	—	C
	Vacuum permeability	µ0	1.25664e-06	N A−2			1.25664e-06		1.25664e-06		1.25664e-06	kg m C−2
	Vacuum permittivity	ε0	8.85419e-12	Fm-1			8.85419e-12		8.85419e-12		8.85419e-12	C2 s2 kg−1 m−3
	Coulomb constant	ke	8.98755e+09	Nm2C−2			8.98755e+09		8.98755e+09		8.98755e+09	kgm3 s−2 C−2
	von Klitzing constant	Rk	25812.8	Ω			25812.8		25812.8		25812.8	kgm2 s C−2
	Josephson constant	KJ	4.83598e+14	Hz / V			4.83598e+14	—	—		4.83598e+14	C s kg−1 m−2
	Bohr magneton	µB	9.27401e-24	J / T			9.27401e-24	—	—		9.27401e-24	C m2 s−1
	Conductance quantum	G0	7.74809e-05	S			7.74809e-05		7.74809e-05		7.74809e-05	C2 s kg−1 m−2
	Magnetic flux quantum	φ0	2.06783e-15	Wb			2.06783e-15	—	—		2.06783e-15	kgm2 s−1 C−1
	Vacuum impedance	Z0	376.73	Ω			376.73	—	—		376.73	kgm2 s C−2
	5.3 Vacuum permeability
	μ0	1.25664e-06	1
	4π FP [tP / qP]2	1.25664e-06	1
	5.4 Electromagnetic potentials
	Table 11
	Constant	Symbol	Unit Value	Dimensions	Std Form	Natural form	value	Alternate	value	Alternate	value	Unit dims
	Current potential	Ip	3.47887e+25	A			3.47887e+25	—	—			A
	Voltage potential	Vp	1.04294e+27	V			1.04294e+27		1.04294e+27		1.04294e+27	kg m2 s−3 A−1
	Impedance potential	Zp	29.9792	Ω			29.9792		29.9792		29.9792	kg m2 s−3 A−2
	Inductance potential	Lp	1.61626e-42	H			1.61626e-42		1.61625e-42		1.61626e-42	kg m2 s−2 A−2
	Magnetic inductance potential	Bp	2.15243e+53	T			2.15243e+53		2.15243e+53		2.15243e+53	kg s−2 A−1
	Conductance potential	Gp	0.0333564	S			0.0333564		0.0333564		0.0333564	s3 A2 kg−1 m−2
	Capacitance potential	Cp	1.79833e-45	F			1.79833e-45		1.79833e-45		1.79833e-45	s4 A2 kg−1 m−2
	Magnetic flux potential	φp	5.62275e-17	Wb			5.62275e-17	—	—		5.62275e-17	kg m2 s−2 A−1
	6. Putting it all together
	R∞	1.09737e+07	CODATA	1
	R∞	1.09737e+07	{ me e4 }{ 8 ε02 h3 c }	1
	R∞	1.09737e+07	{ me α2 c }{ 2h }	1
	R∞	1.09737e+07	{ me α2 }{ 4π lP mP }	1
	6.1 Luminosity
		Equality		Natural Unit Formula		Simplified Formula
		Sun's temperature	5778	K
		Sun's surface area	6.09008e+18	m2
			Constant	Radiant power per Planck area	Planck energy per Planck time	Ratio of the sun's surface area to Planck area	Sun's luminosity
			−	E T−1	W	L2	W
			0.164493	2.76628e-114	3.62825e+52	2.33133e+88	3.84897e+26
	Standard luminosity formula result		The Natural unit formula illustrates how temperature is converted to power per Planck area and then expanded to the sun's surface
	Standard luminosity formula result		Avg kinetic energy & radiation energy equivalent	Photon energy in natural units	Photon period in natural units	Radiant power per Planck length	Radiant power per Planck area	Planck power	Radiant power per Planck area	Scaling factor from the Planck area to the sun's surface area	Multiplied by a constant	Equals the sun's luminosity
	W		J	E	T	E T−1	E T−1	W	W	L2	dimensionless	W
	3.84897e+26		7.97739e-20	4.07825e-29	2.45203e+28	1.66321e-57	2.76628e-114	3.62825e+52	1.00368e-61	2.33133e+88	0.164493	3.84897e+26
	Appendix
	Table 13
	Unit	conversion	Unit	formula
	1 m	3.33564e-09	s	tP / lP
	1 m	1.34659e+27	kg	mP / lP
	1 m	1.16043e+17	C	qP / lP
	1 s	299792458	m	lP / tP
	1 s	4.03698e+35	kg	mP / tP
	1 s	3.47887e+25	C	qP / tP
	1 kg	7.42616e-28	m	lP / mP
	1 kg	2.4771e-36	s	tP / mP
	1 kg	8.61752e-11	C	qP / mP
	1 C	8.61752e-18	m	lP / qP
	1 C	2.87449e-26	s	tP / qP
	1 C	1.16043e+10	kg	mP / qP
